# Supplementary material for: A snapshot sample on how COVID-19 impacted and holds up a mirror to European water education
Source: Copernicus journal article supplement (doi:10.5194/gc-5-261-2022), 2022-09-14
Supplement: Supplementary file 1 [file gc-5-261-2022-supplement.pdf]

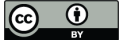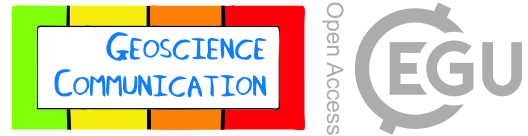

*Supplement of*

## **A snapshot sample on how COVID-19 impacted and holds up a mirror to European water education**

**Benjamin M. C. Fischer and Alexandru Tatomir**

*Correspondence to:* Benjamin M. C. Fischer ([benjamin.fischer@geo.uu.se](mailto:benjamin.fischer@geo.uu.se))

The copyright of individual parts of the supplement might differ from the article licence.
